# Supplementary material for: CO and CO2 Methanation over CeO2-Supported Cobalt Catalysts
Source: MDPI journal article supplement (doi:10.3390/catal12020212), 2022-02-11
Supplement: s1 [file s1]

Submitted to *Catalysts*

## Supporting information

### CO<sub>2</sub> Methanation over CeO<sub>2</sub>–supported Co Catalysts

T. Thuy Ha Nguyen <sup>1</sup>, Han Bom Kim <sup>1</sup> and Eun Duck Park <sup>1,2\*</sup>

<sup>1</sup>*Department of Energy Systems Research, Ajou University 206, World cup-ro,*

*Yeongtong-Gu, Suwon 16499, Republic of Korea; ntthuyha@ajou.ac.kr;*

*madinga@ajou.ac.kr; edpark@ajou.ac.kr.*

<sup>2</sup>*Department of Chemical Engineering, Ajou University 206, World cup-ro, Yeongtong-*

*Gu, Suwon 16499, Republic of Korea; edpark@ajou.ac.kr*

\* Tel.: 82-31-219-2384, Fax: 82-31-219-1612, E-mail: *edpark@ajou.ac.kr*

\* To whom all correspondence should be addressed.

**Table S1.** Quantitative analysis of the CO<sub>2</sub>-TPD data.<sup>a</sup>

| Catalyst                                                 | Peak 1<br>(< 200 °C) |                                                    | Peak 2<br>(200-300 °C) |                                                    | Peak 3<br>(300-600 °C) |                                                    |
|----------------------------------------------------------|----------------------|----------------------------------------------------|------------------------|----------------------------------------------------|------------------------|----------------------------------------------------|
|                                                          | Peak area<br>(%)     | CO <sub>2</sub> uptake<br>(μmol/g <sub>cat</sub> ) | Peak area<br>(%)       | CO <sub>2</sub> uptake<br>(μmol/g <sub>cat</sub> ) | Peak area<br>(%)       | CO <sub>2</sub> uptake<br>(μmol/g <sub>cat</sub> ) |
| Co <sub>0.1</sub> Ce <sub>0.9</sub> O <sub>x</sub> (300) | -                    | -                                                  | 38                     | 47                                                 | 62                     | 77                                                 |
| Co <sub>0.1</sub> Ce <sub>0.9</sub> O <sub>x</sub> (500) | 37                   | 54                                                 | -                      | -                                                  | 63                     | 92                                                 |
| Co <sub>0.1</sub> Ce <sub>0.9</sub> O <sub>x</sub> (700) | 47                   | 28                                                 | -                      | -                                                  | 53                     | 31                                                 |
| Co/CeO <sub>2</sub> (300)                                | 42                   | 52                                                 | -                      | -                                                  | 58                     | 70                                                 |
| Co/CeO <sub>2</sub> (500)                                | 38                   | 47                                                 | -                      | -                                                  | 62                     | 76                                                 |
| Co/CeO <sub>2</sub> (700)                                | 39                   | 48                                                 | -                      | -                                                  | 61                     | 74                                                 |

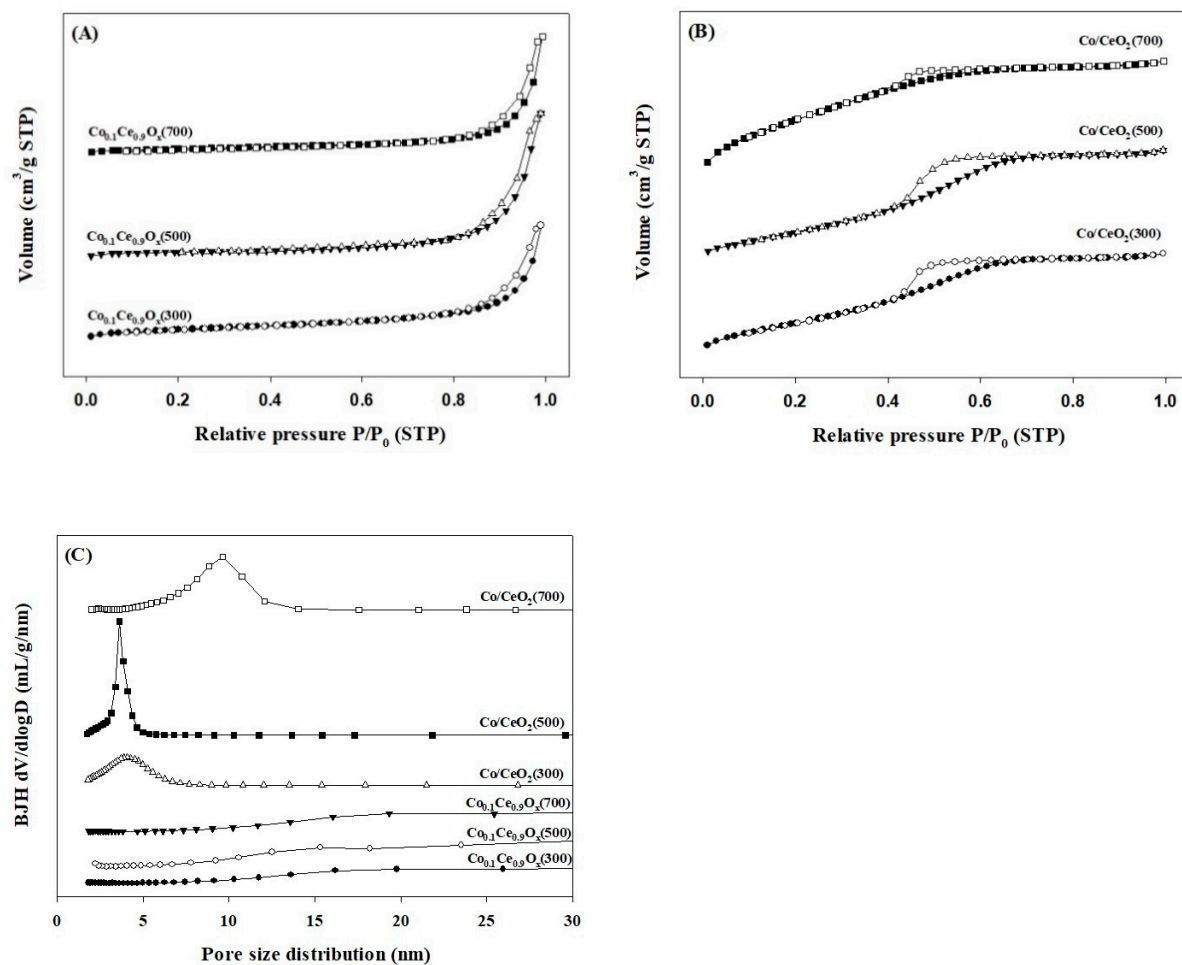

**Figure S1.** Nitrogen adsorption and desorption isotherms (A, B) and pore size distribution (C) of ceria-supported cobalt catalysts calcined in air at different temperatures.

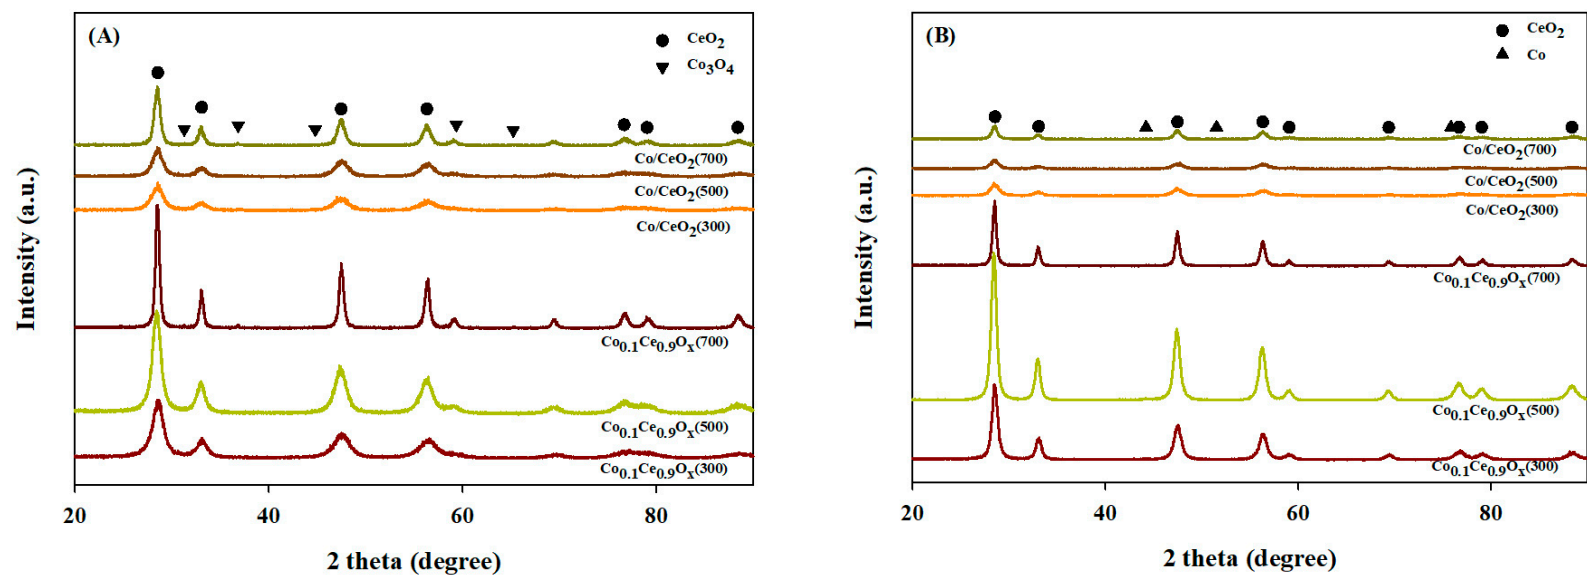

**Figure S2.** XRD patterns of ceria-supported cobalt catalysts calcined in air at different temperatures (A) and after reduction in  $\text{H}_2$  at 500 °C (B).

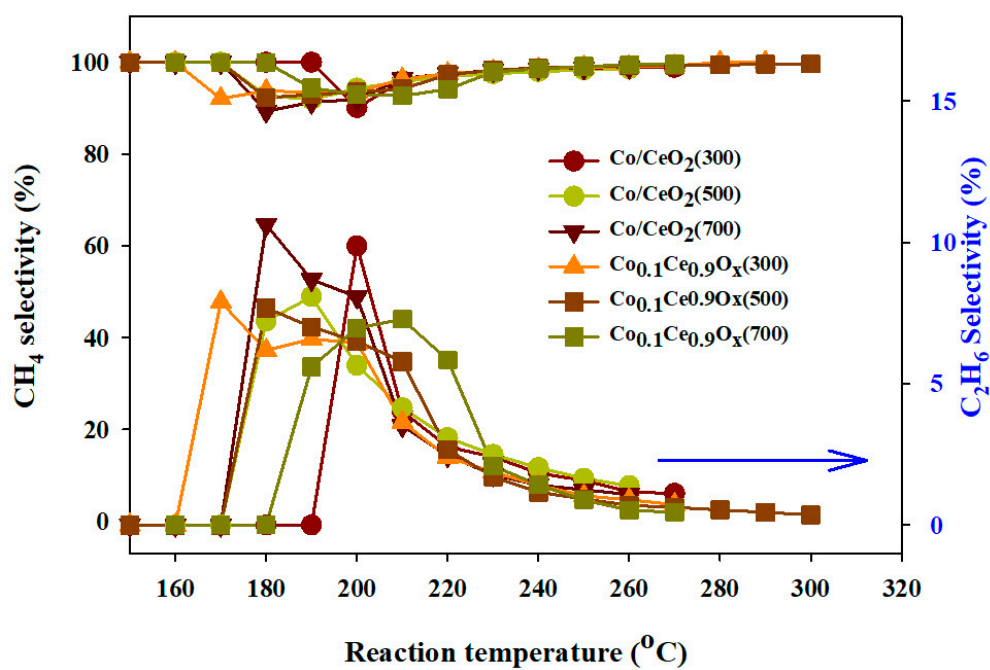

**Figure S3.** Carbon selectivities for CH<sub>4</sub> and C<sub>2</sub>H<sub>6</sub> for CO methanation over ceria-supported cobalt catalysts.

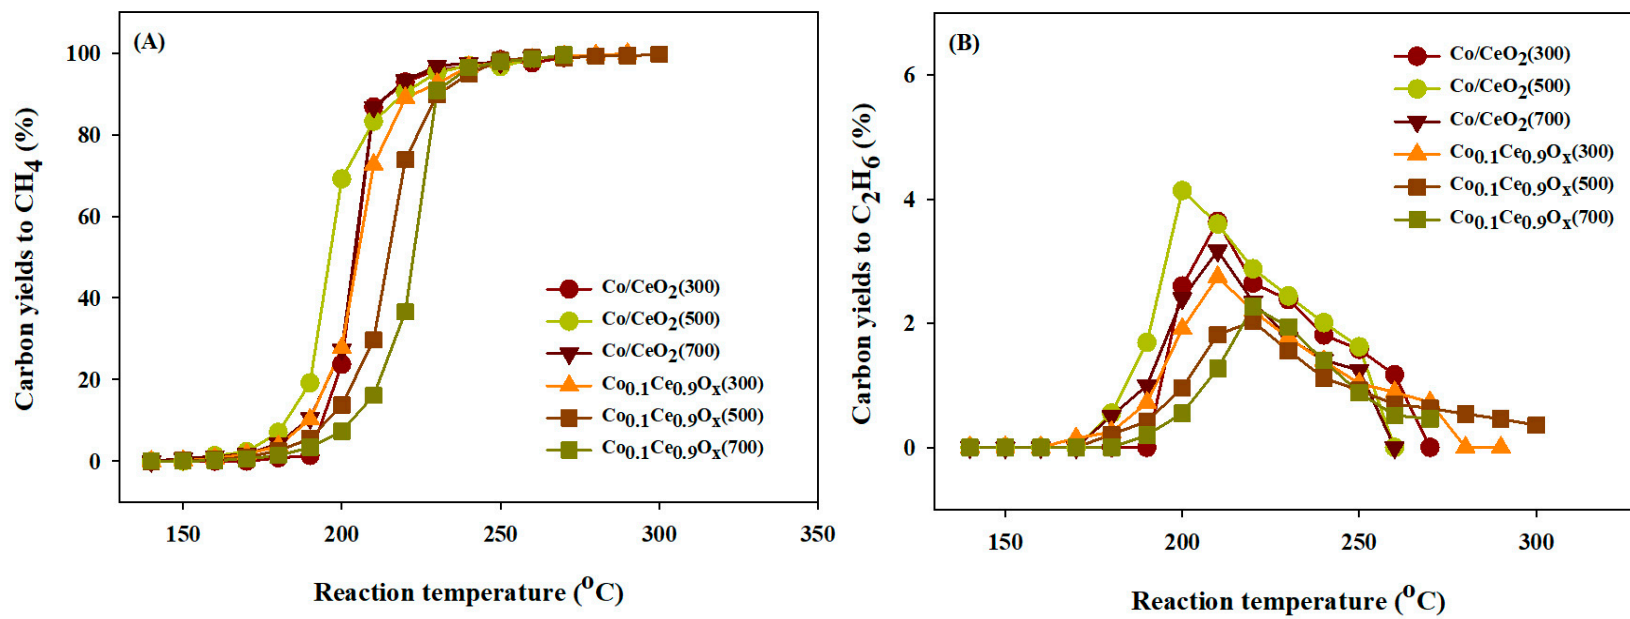

**Figure S4.** Product yields for CO methanation over ceria-supported cobalt catalysts.

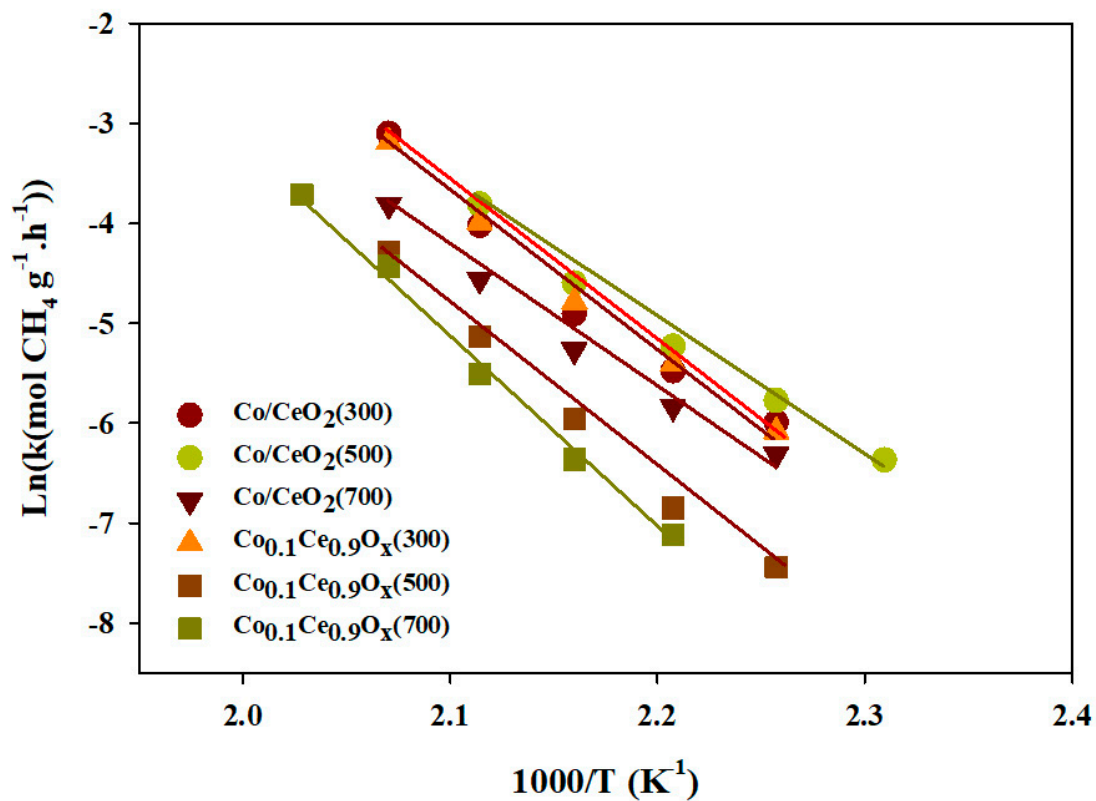

**Figure S5.** Arrhenius plot for CO methanation over ceria-supported cobalt catalysts. All catalysts were reduced in H<sub>2</sub> at 500 °C. The feed gas is composed of 1 mol% CO, 49 mol% He, and 50 mol% H<sub>2</sub> and total flow rate is 100 mL/min.

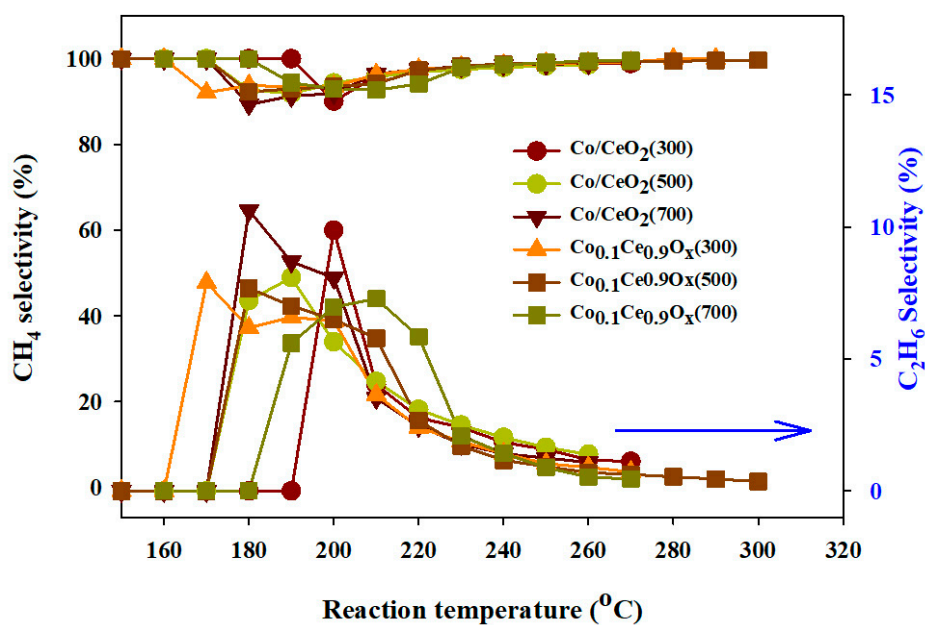

**Figure S6.** Carbon selectivities for CH<sub>4</sub> and CO for CO<sub>2</sub> methanation over ceria-supported cobalt catalysts.



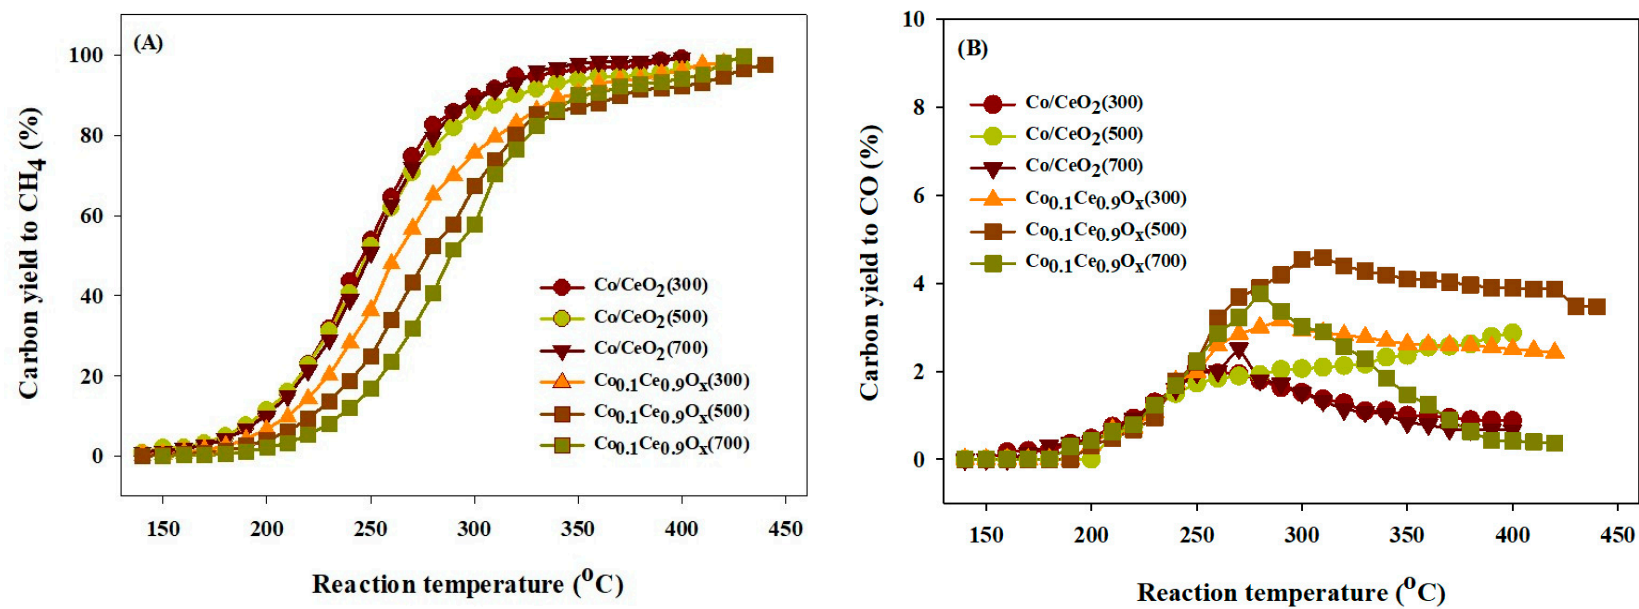

**Figure S7.** Product yields for CO<sub>2</sub> methanation over ceria-supported cobalt catalysts.

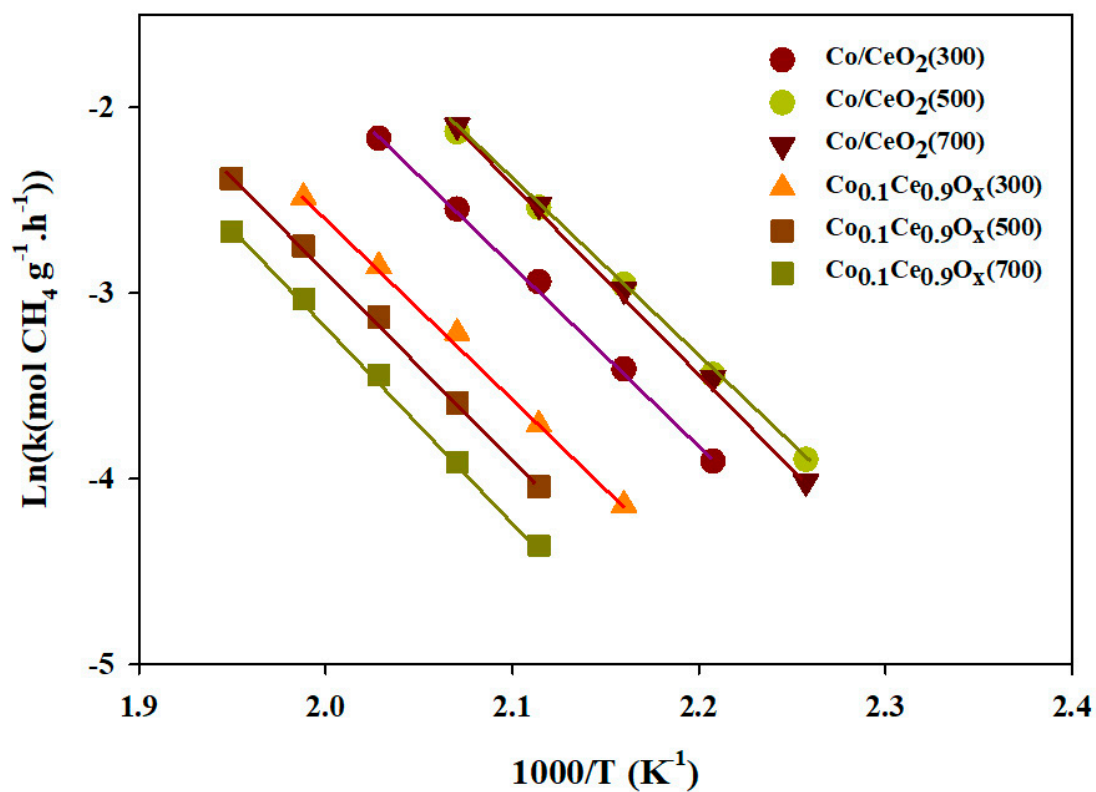

**Figure S8.** Arrhenius plot for CO<sub>2</sub> methanation over ceria-supported cobalt catalysts. All catalysts were reduced in H<sub>2</sub> at 500 °C. The feed gas is composed of 1 mol% CO<sub>2</sub>, 49 mol% He, and 50 mol% H<sub>2</sub> and total flow rate is 100 mL/min.

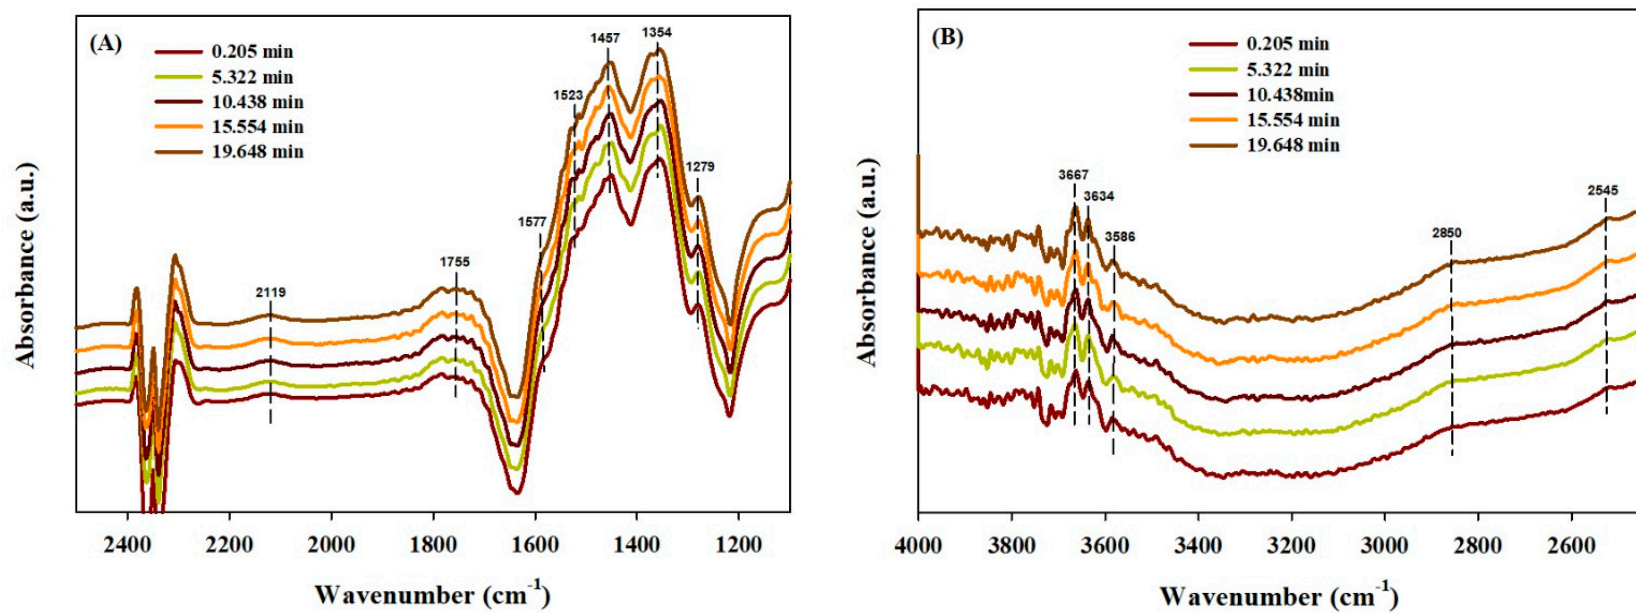

**Figure S9.** *In-situ* DRIFTS spectra after adsorption of CO<sub>2</sub> on Co<sub>0.1</sub>Ce<sub>0.9</sub>O<sub>x</sub>(300) catalyst at 300 °C. The feed is composed of 33 mol% CO<sub>2</sub> and 67 mol% He.

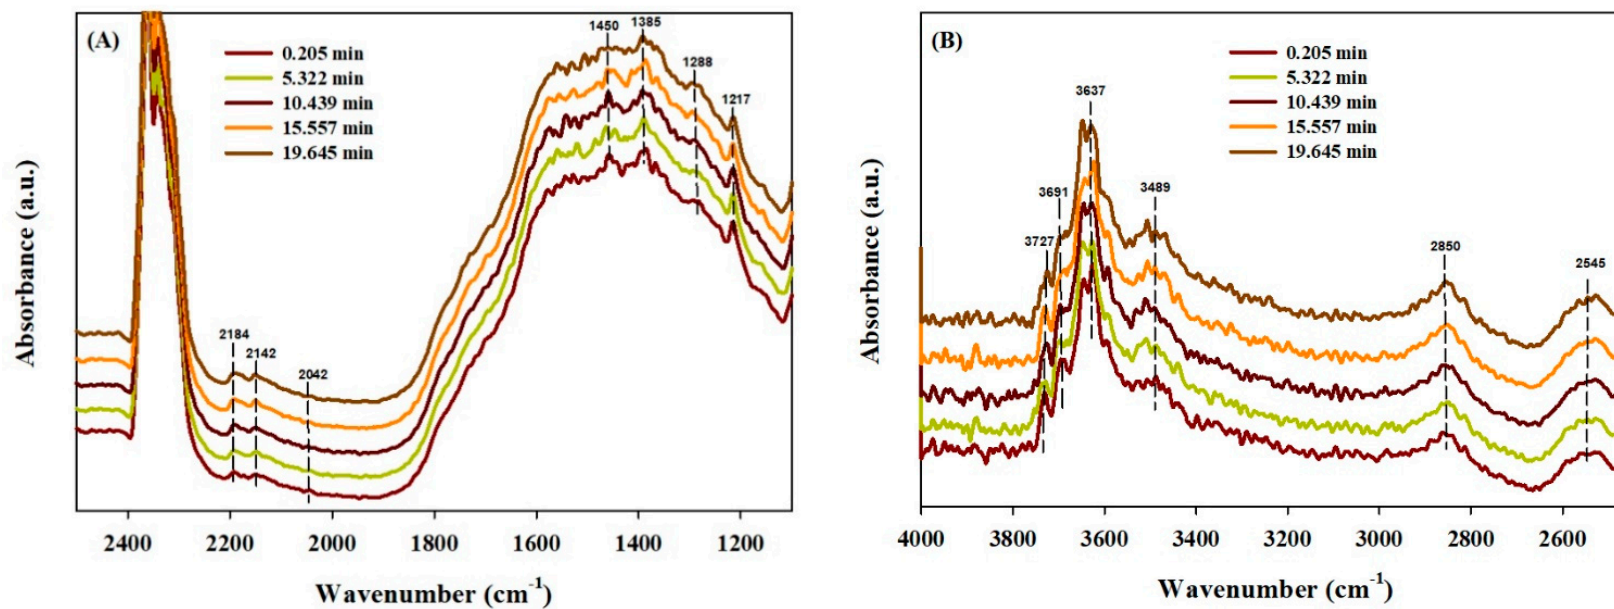

**Figure S10.** *In-situ* DRIFTS spectra after adsorption of CO<sub>2</sub> on Co/CeO<sub>2</sub>(500) catalyst at 300 °C. The feed is composed of 33 mol% CO<sub>2</sub> and 67 mol% He.
