# Supplementary material for: CO and CO2 Methanation over CeO2-Supported Cobalt Catalysts
Source: MDPI journal article supplement (doi:10.3390/catal12020212), 2022-02-11
Supplement: s1 [file s1]

Archive with 1 entries (1 files):
- catalysts-1552758-supplementary.pdf
